# Supplementary material for: Oxysterol Signatures Distinguish Age-Related Macular Degeneration from Physiologic Aging
Source: PubMed Central journal article supplement (PMC6021272; doi:10.1016/j.ebiom.2018.05.035), 2018-06-11
Supplement: mmc1.pdf [file mmc1.pdf]

## **Supplemental Data**

### **Oxysterol signatures distinguish age-related macular degeneration from physiologic aging**

Jonathan B. Lin<sup>†</sup>, Abdoulaye Sene<sup>†</sup>, Andrea Santeford, Hideji Fujiwara, Rohini Sidhu, Marianne M. Ligon, Vikram A. Shankar, Norimitsu Ban, Indira U. Mysorekar, Daniel S. Ory, & Rajendra S. Apte<sup>\*</sup>

<sup>†</sup> Co-first authors

<sup>\*</sup> Corresponding author

### **Inventory of Supplemental Information**

Supplemental Table S1

Supplemental Figures S1-S2

**Supplemental Table S1.** Lipid-related gene assays used in custom array plate.

| <b>Gene target</b> | <b>TaqMan® assay probe</b> |
|--------------------|----------------------------|
| 18sRNA             | Hs99999901_s1              |
| Actb               | Mm00607939_s1              |
| Abca1              | Mm00442646_m1              |
| Abca2              | Mm00431553_m1              |
| Abcg1              | Mm00437390_m1              |
| Acaa2              | Mm00624282_m1              |
| Akr1d1             | Mm01165275_m1              |
| Angptl3            | Mm00803820_m1              |
| Ankra2             | Mm00499234_m1              |
| Apoa1              | Mm00437569_m1              |
| Apoa2              | Mm00442687_m1              |
| Apoa4              | Mm00431814_m1              |
| Apob               | Mm01545156_m1              |
| Apoc3              | Mm00445670_m1              |
| Apod               | Mm00431817_m1              |
| Apoe               | Mm00437573_m1              |
| Apof               | Mm00506066_g1              |
| Apol8              | Mm01195284_m1              |
| Cdh13              | Mm00490584_m1              |
| Cel                | Mm00486975_m1              |
| Cnbp               | Mm00488938_m1              |
| Colec12            | Mm01236238_m1              |
| Cxcl16             | Mm00469712_m1              |
| Cyb5r3             | Mm00504077_m1              |
| Cyp11a1            | Mm00490735_m1              |
| Cyp39a1            | Mm00517066_m1              |
| Cyp46a1            | Mm00487306_m1              |
| Cyp51              | Mm00490968_m1              |
| Cyp7a1             | Mm00484152_m1              |
| Cyp7b1             | Mm00484157_m1              |
| Dhcr24             | Mm00519071_m1              |
| Dhcr7              | Mm00514571_m1              |
| Ebp                | Mm00468191_m1              |
| Ela3/Cela3b        | Mm00840378_m1              |
| Fdft1              | Mm00815354_s1              |
| Fdps               | Mm00836315_g1              |
| Hdlbp              | Mm00505507_m1              |
| Hmgcr              | Mm01282499_m1              |
| Hmgcs1             | Mm01304569_m1              |
| Hmgcs2             | Mm00550050_m1              |
| Idi1               | Mm01337454_m1              |

|         |               |
|---------|---------------|
| Idi2    | Mm00841471_g1 |
| Il4     | Mm00445259_m1 |
| Insig1  | Mm00463389_m1 |
| Insig2  | Mm00460121_m1 |
| Lcat    | Mm00500505_m1 |
| Ldlr    | Mm00440169_m1 |
| Ldlrap1 | Mm00521157_m1 |
| Lep     | Mm00434759_m1 |
| Lipe    | Mm00495359_m1 |
| Lrp10   | Mm00499125_m1 |
| Lrp12   | Mm01168065_m1 |
| Lrp1b   | Mm00466712_m1 |
| Lrp6    | Mm00999795_m1 |
| Lrpap1  | Mm00660272_m1 |
| Mbtps1  | Mm00490600_m1 |
| Mvd     | Mm00507014_m1 |
| Mvk     | Mm00445773_m1 |
| Npc111  | Mm01191972_m1 |
| Nr0b2   | Mm00442278_m1 |
| Nr1h4   | Mm01240553_m1 |
| Nsdhl   | Mm00477897_m1 |
| Olr1    | Mm00454586_m1 |
| Osbp11a | Mm00498552_m1 |
| Osbp15  | Mm00600357_m1 |
| Pesk9   | Mm01263610_m1 |
| Pmvk    | Mm01212763_m1 |
| Ppard   | Mm00803184_m1 |
| Prkaa1  | Mm01296700_m1 |
| Prkaa2  | Mm01264789_m1 |
| Prkag2  | Mm00513977_m1 |
| Scap    | Mm01250183_g1 |
| Scarf1  | Mm01240399_m1 |
| Snx17   | Mm01220541_g1 |
| Soat1   | Mm00486279_m1 |
| Soat2   | Mm00448823_m1 |
| Sor11   | Mm01169562_m1 |
| Srebf1  | Mm00550338_m1 |
| Srebf2  | Mm01306292_m1 |
| Stab1   | Mm00460390_m1 |
| Stab2   | Mm00454684_m1 |
| Stard3  | Mm00445520_m1 |
| Tm7sf2  | Mm01233546_g1 |
| Trerf1  | Mm01278040_m1 |

|            |               |
|------------|---------------|
| Vldlr      | Mm00443281_m1 |
| Zmynd15    | Mm02600120_g1 |
| Acat1      | Mm00507463_m1 |
| Acadvl     | Mm00444296_m1 |
| Adfp/Plin2 | Mm00475794_m1 |
| Alox12     | Mm00545833_m1 |
| Alox15     | Mm01250458_m1 |
| Alox5      | Mm01182743_m1 |
| Alox5ap    | Mm00802100_m1 |
| Cd36       | Mm00432403_m1 |
| Gapdh      | Mm99999915_g1 |
| Cyp27a1    | Mm00470430_m1 |
| Fabp4      | Mm00445878_m1 |
| Fabp5      | Mm00783731_s1 |
| Fads1      | Mm00507605_m1 |
| Fads2      | Mm00517221_m1 |
| Fads3      | Mm00517643_m1 |
| Gyk        | Mm00433896_m1 |
| Hadhb      | Mm00523880_g1 |
| Lta4h      | Mm01246216_m1 |
| Ltc4s      | Mm00521864_m1 |
| Lpl        | Mm00434770_m1 |
| Nr1h3      | Mm00443451_m1 |
| Pla2g4a    | Mm00447040_m1 |
| Pparg      | Mm01184322_m1 |
| Slc16a6    | Mm00506192_m1 |
| Slc27a1    | Mm00449511_m1 |
| Slc27a3    | Mm01220009_g1 |
| Stard4     | Mm00505395_m1 |
| Scd1       | Mm00772290_m1 |
| Tbxas1     | Mm00495553_m1 |
| Ucp2       | Mm00627599_m1 |

---

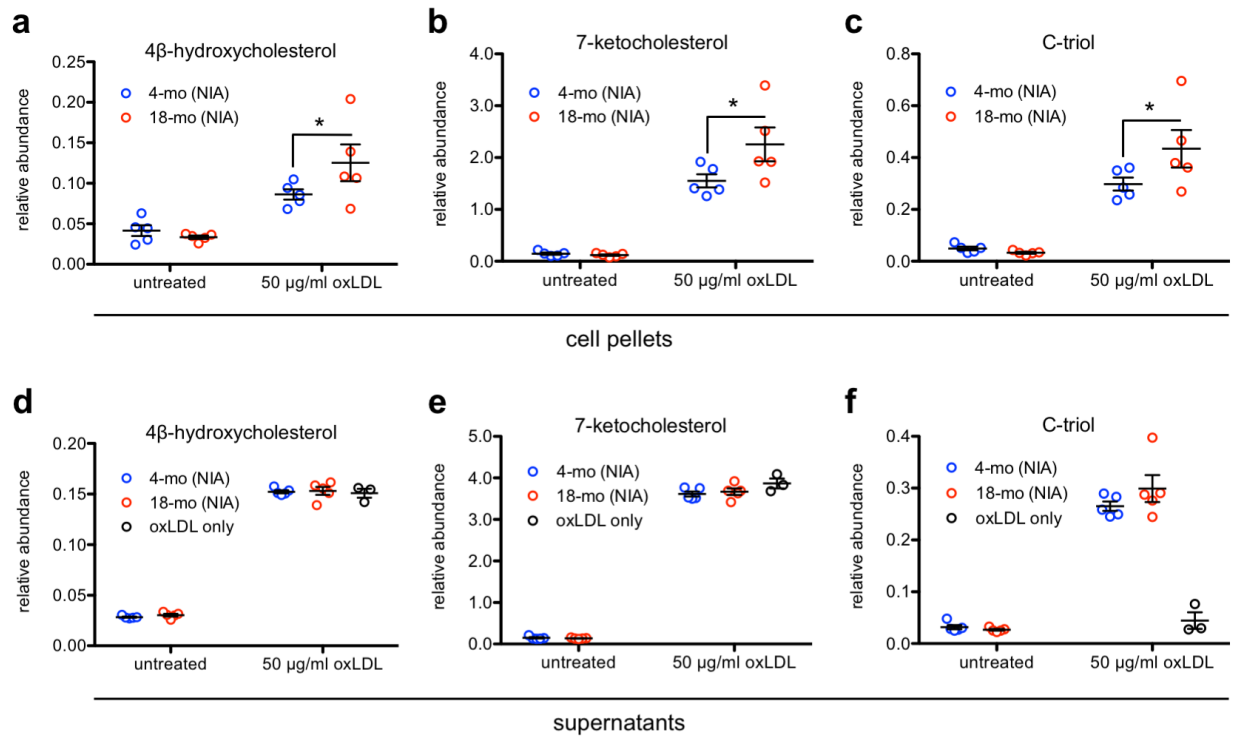

**Supplemental Figure S1.** Aged peritoneal macrophages have abnormal oxysterol content compared to young peritoneal macrophages isolated from mice housed at the same facility. (a-c) Aged peritoneal macrophages contained significantly more intracellular 4 $\beta$ -hydroxycholesterol (4 $\beta$ -HC), 7-ketocholesterol (7-KC), and cholestane-3 $\beta$ ,5 $\alpha$ ,6 $\beta$ -triol (C-triol) than their young counterparts after treatment with 50  $\mu$ g/ml oxidized LDL (oxLDL) (N = 5/group; 1-tailed Mann-Whitney U test). (d-f) The supernatant of young and aged peritoneal macrophages contained similar levels of 4 $\beta$ -HC, 7-KC, and C-triol both at baseline and after treatment with oxLDL (N = 5/group; 2-tailed Mann-Whitney U test). Open circles depict individual data points; horizontal lines depict mean  $\pm$  S.E.M. (a-f) (\* P < .05).

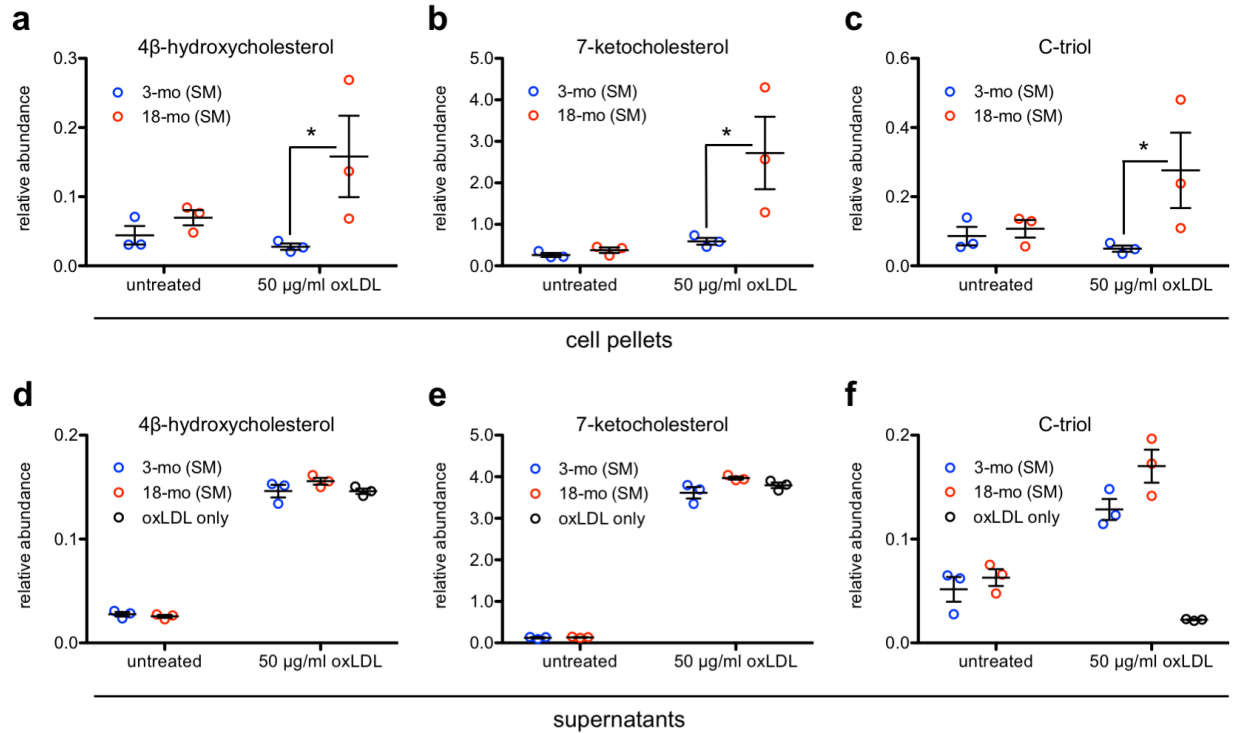

**Supplemental Figure S2.** Aged splenic macrophages (SM) have abnormal oxysterol content compared to young SM. (a-c) Aged SM contained significantly more intracellular 4β-hydroxycholesterol (4β-HC), 7-ketocholesterol (7-KC), and cholestane-3β,5α,6β-triol (C-triol) compared to their young counterparts after treatment with 50 μg/ml oxidized LDL (oxLDL) (N = 3/group; 1-tailed Mann-Whitney U test). (d-f) The supernatant of young and aged SM contained similar levels of 4β-HC, 7-KC, and C-triol both at baseline and after treatment with oxLDL (N = 3/group; 2-tailed Mann-Whitney U test). Open circles depict individual data points; horizontal lines depict mean ± S.E.M. (a-f) (\* P < .05).
